# Supplementary material for: A new basal hadrosaurid (Dinosauria: Ornithischia) from the latest Cretaceous Kita-ama Formation in Japan implies the origin of hadrosaurids
Source: PubMed Central journal article supplement (PMC8076177; doi:10.1038/s41598-021-87719-5), 2021-04-27
Supplement: 41598_2021_87719_MOESM1_ESM.pdf [file 41598_2021_87719_MOESM1_ESM.pdf]

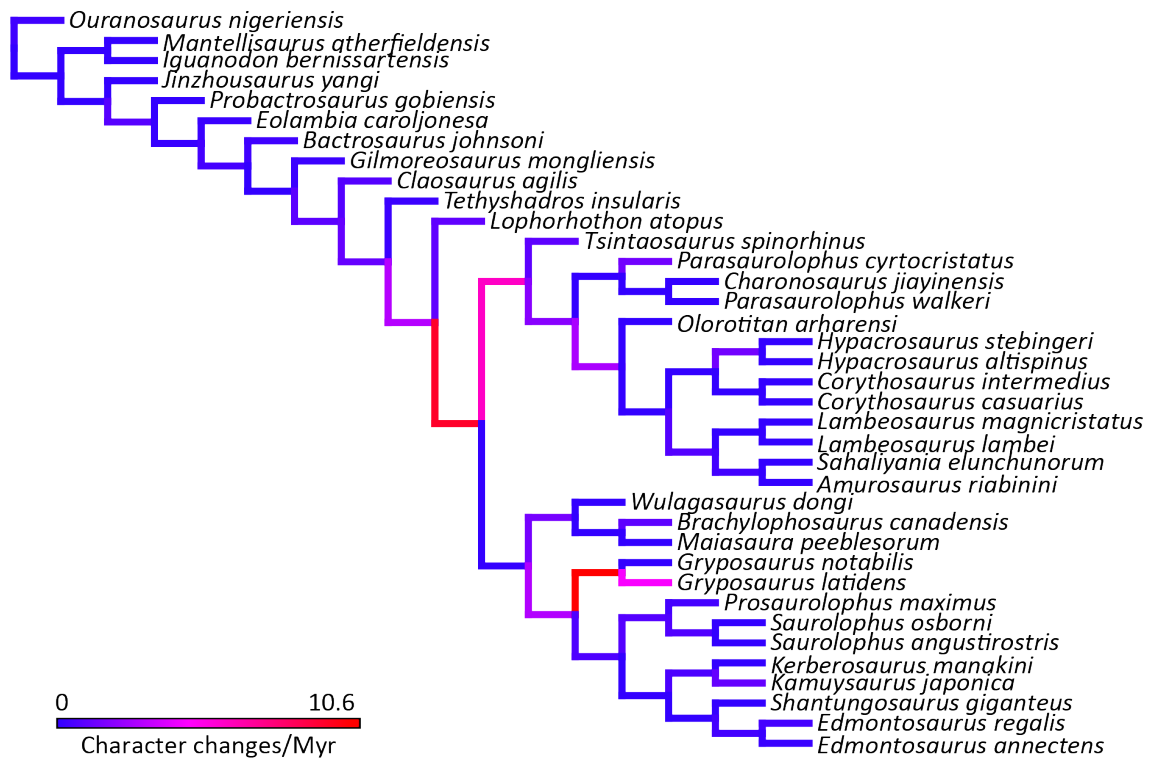

Supplementary Figure S1. Forelimb evolutionary rates on each branch based on the present phylogenetic hypothesis without *Yamatosaurus izanagii*.

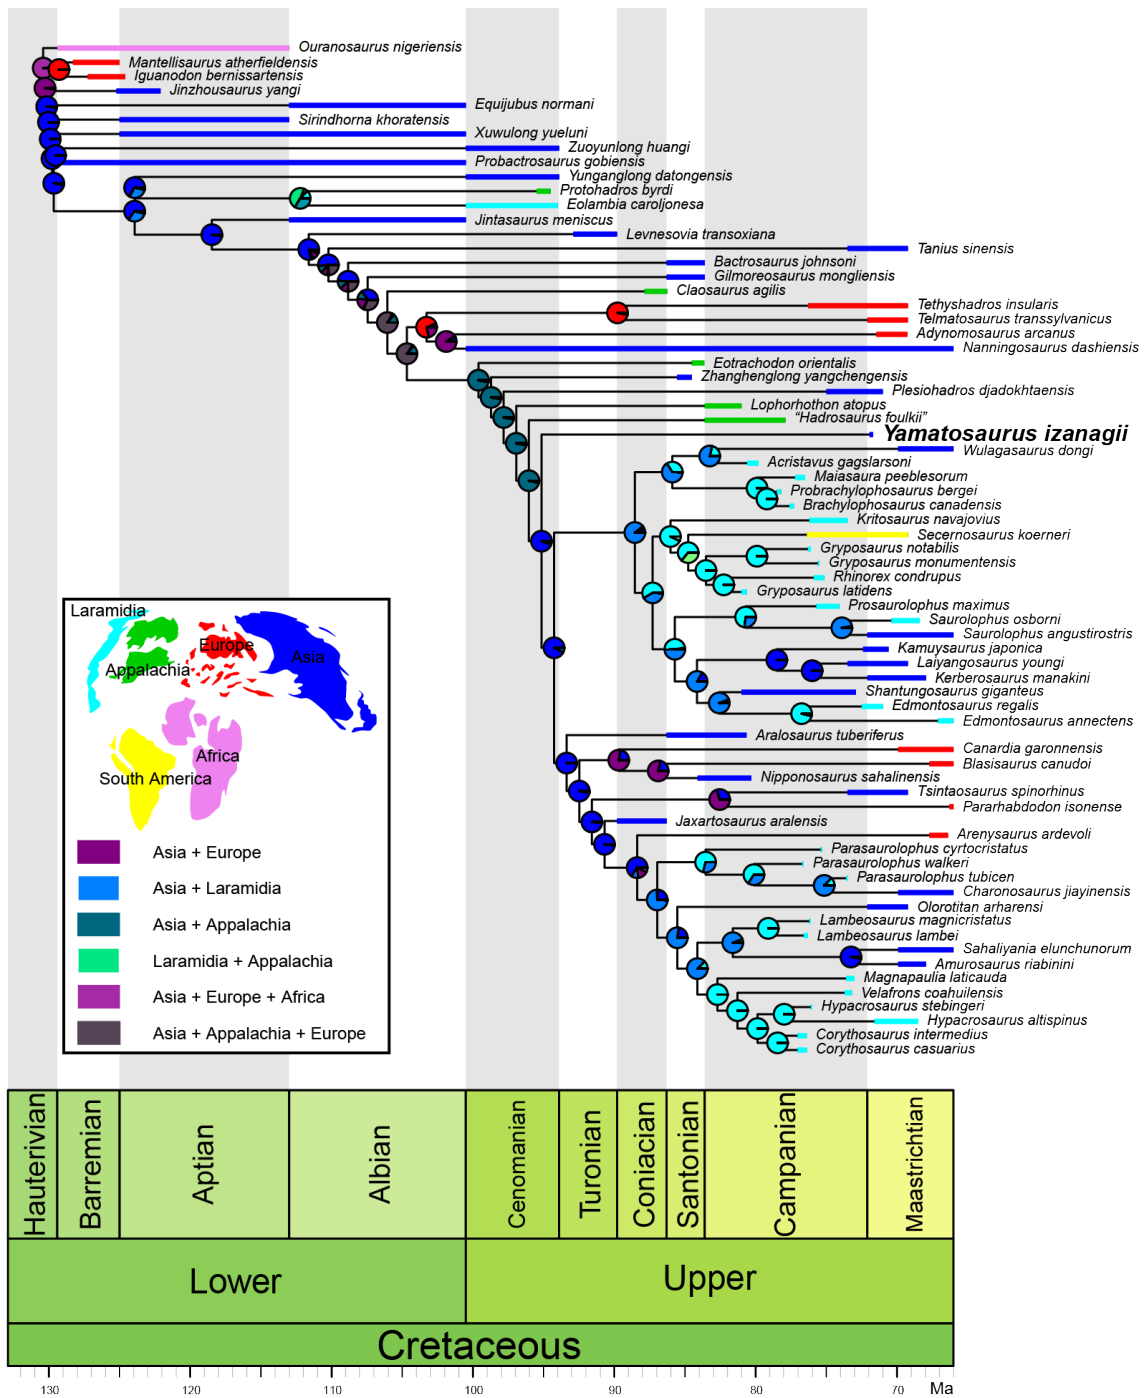

Supplementary Figure S2. Result of the biogeographic analysis using the “relaxed” dispersal multiplier matrix.

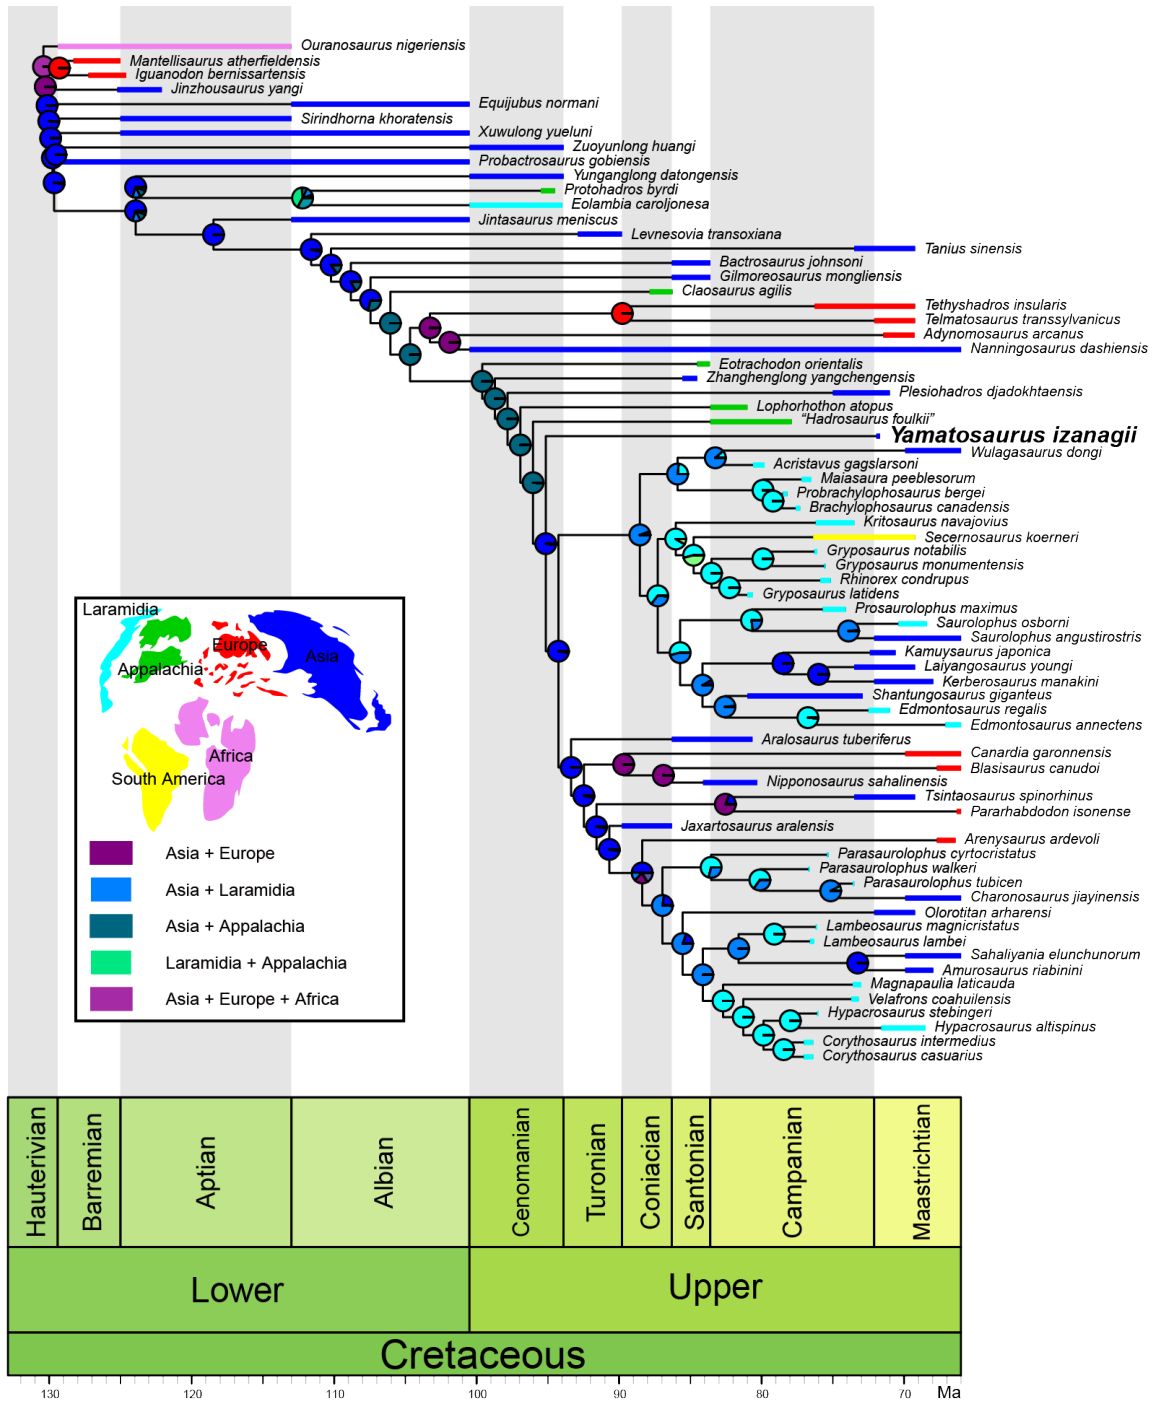

Supplementary Figure S3. Result of the biogeographic analysis using the “harsh” dispersal multiplier matrix.
